# Supplementary material for: A bottom-up emission estimate for the 2022 Nord-Stream gas leak: derivation, simulations and evaluation
Source: Copernicus journal article supplement (doi:10.5194/egusphere-2023-732), 2023-09-15
Supplement: Supplementary file 1 [file egusphere-2023-732-supplement.zip]

# Supplementary material for: A bottom-up emission estimate for the 2022 Nord Stream gas leak: derivation, simulations and evaluation

Rostislav Kouznetsov<sup>1</sup>, Risto Hänninen<sup>1</sup>, Andreas Uppstu<sup>1</sup>, Evgeny Kadantsev<sup>1</sup>, Yalda Fatahi<sup>1</sup>, Marje Prank<sup>1</sup>, Dmitrii Kouznetsov<sup>2</sup>, Steffen Noe<sup>3</sup>, Heikki Junninen<sup>4</sup>, and Mikhail Sofiev<sup>1</sup>

<sup>1</sup>Finnish Meteorological Institute, Helsinki, Finland

<sup>2</sup>University of Electro-Communications, Tokyo, Japan

<sup>3</sup>Estonian University of Life Sciences, Tartu, Estonia

<sup>4</sup>University of Tartu, Estonia

**Correspondence:** Rostislav Kouznetsov (Rostislav.Kouznetsov@fmi.fi)

## 1 Simulation setup

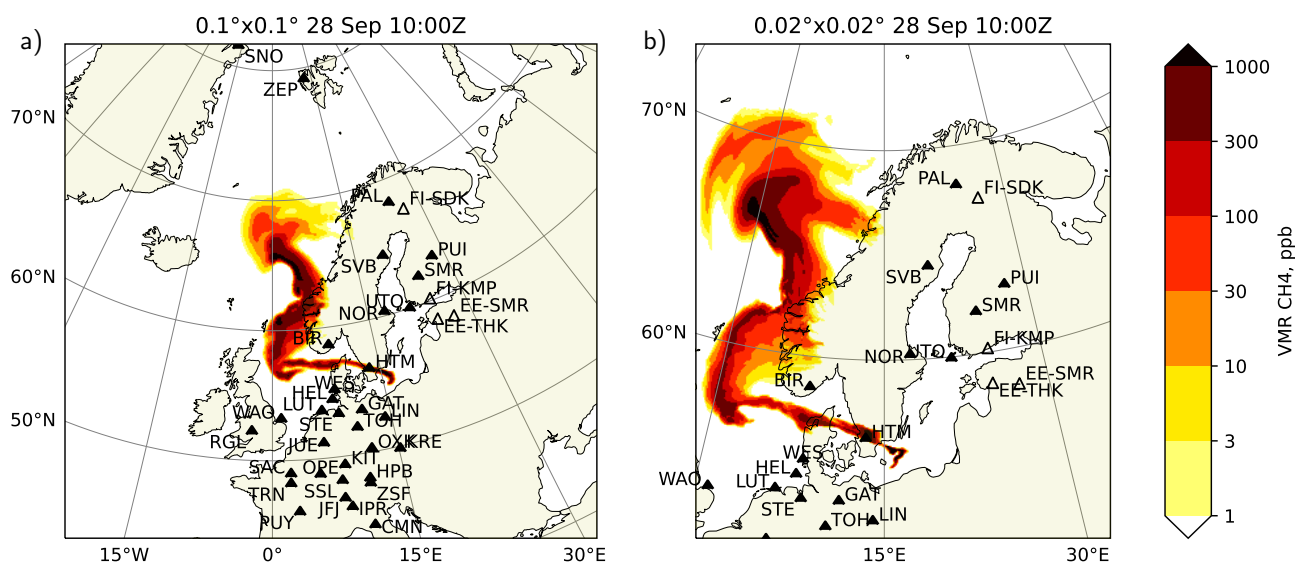

**Figure S1.** Simulation domains used for the study, and locations of the observation stations. ICOS stations shown with filled symbols.

The simulations were performed with Silam model on two domains shown in Fig. S1. The larger domain was simulated at 0.1-deg and 0.4-deg resolution (Fig. S1a) driven with the same set of operational ECMWF forecasts, The smaller domain was simulated at 0.02-deg resolution (Fig. S1b), with MEPS unperturbed-member forecasts with 2.5-km resolution.

## 5 2 Timeseries for Stations

This section shows simulated and observed timeseries for the stations that did not fit to the main paper.

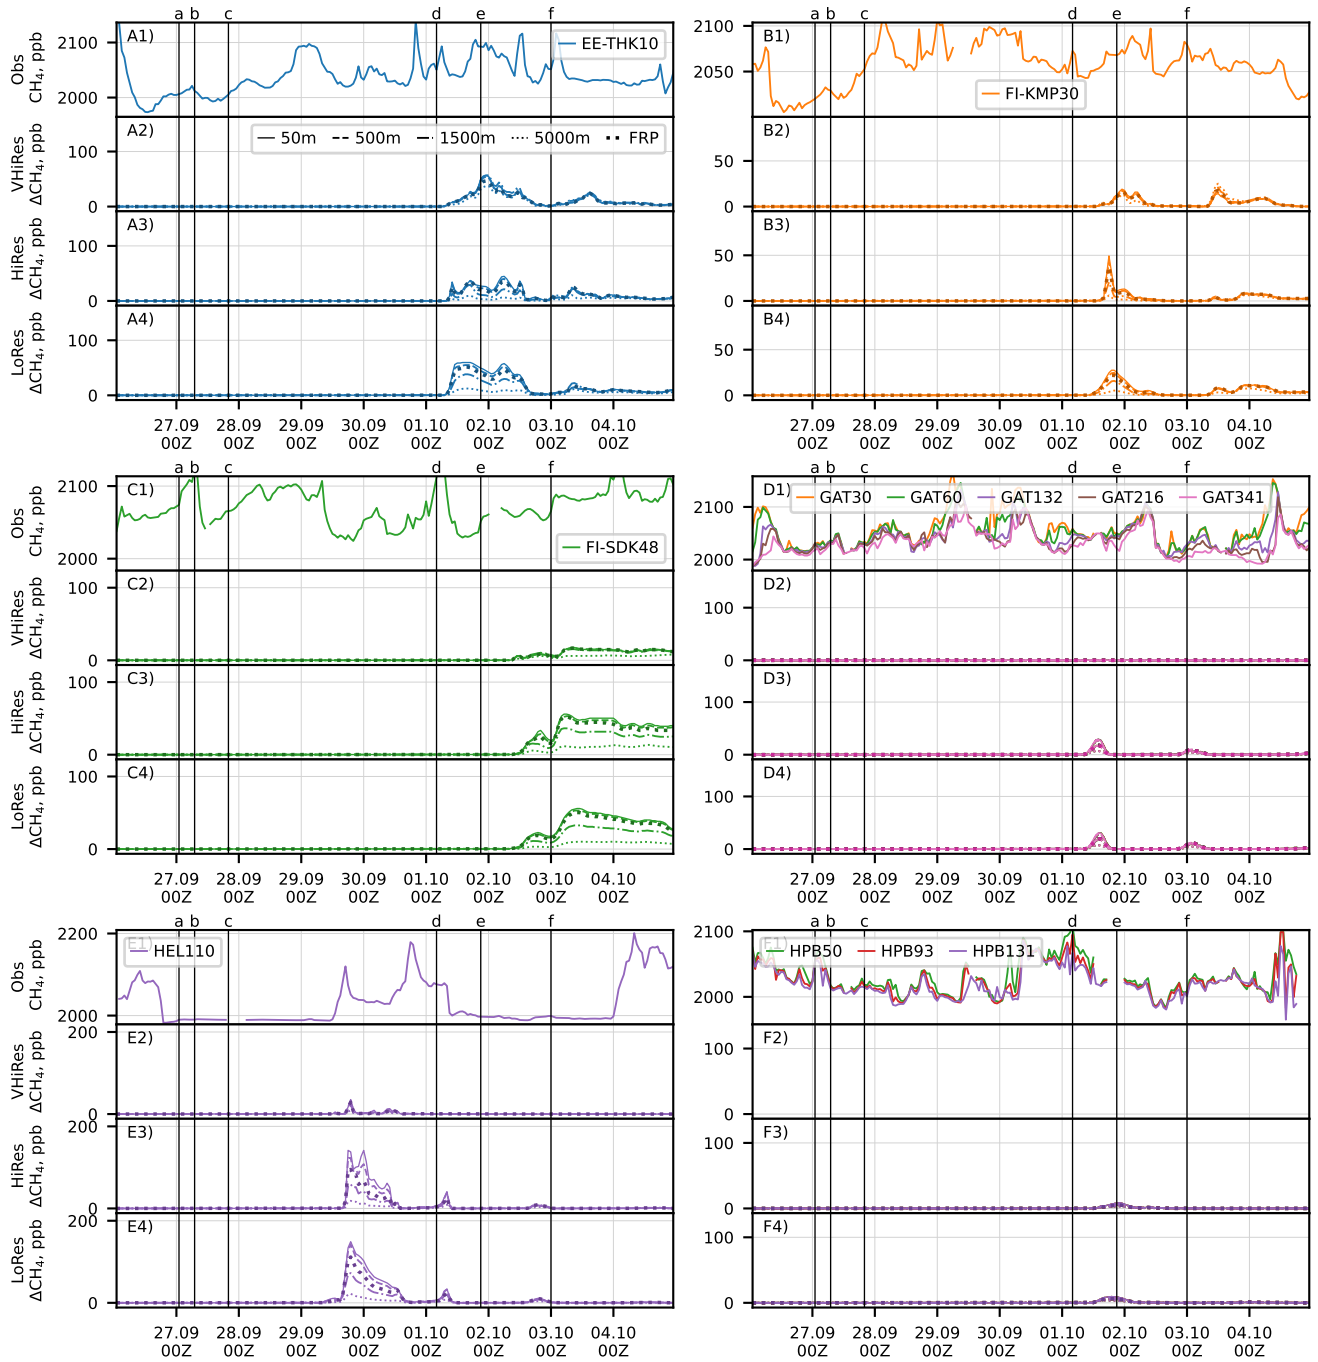

**Figure S2.** Timeseries of methane mixing ratio observed at EE-THK, FI-KMP, FI-SDK, GAT, HEL and HPB stations after the pipeline rupture, and corresponding timeseries simulated with three different resolutions for several vertical profiles of the release. Each group of panels corresponds to a station. The panels in each group are (top down) for observations, and model with 0.02-deg, 0.1-deg, 0.4-deg resolution. Measurement heights are coded with colors, and emission heights with line styles. Vertical lines mark the moments shown in maps of the main paper

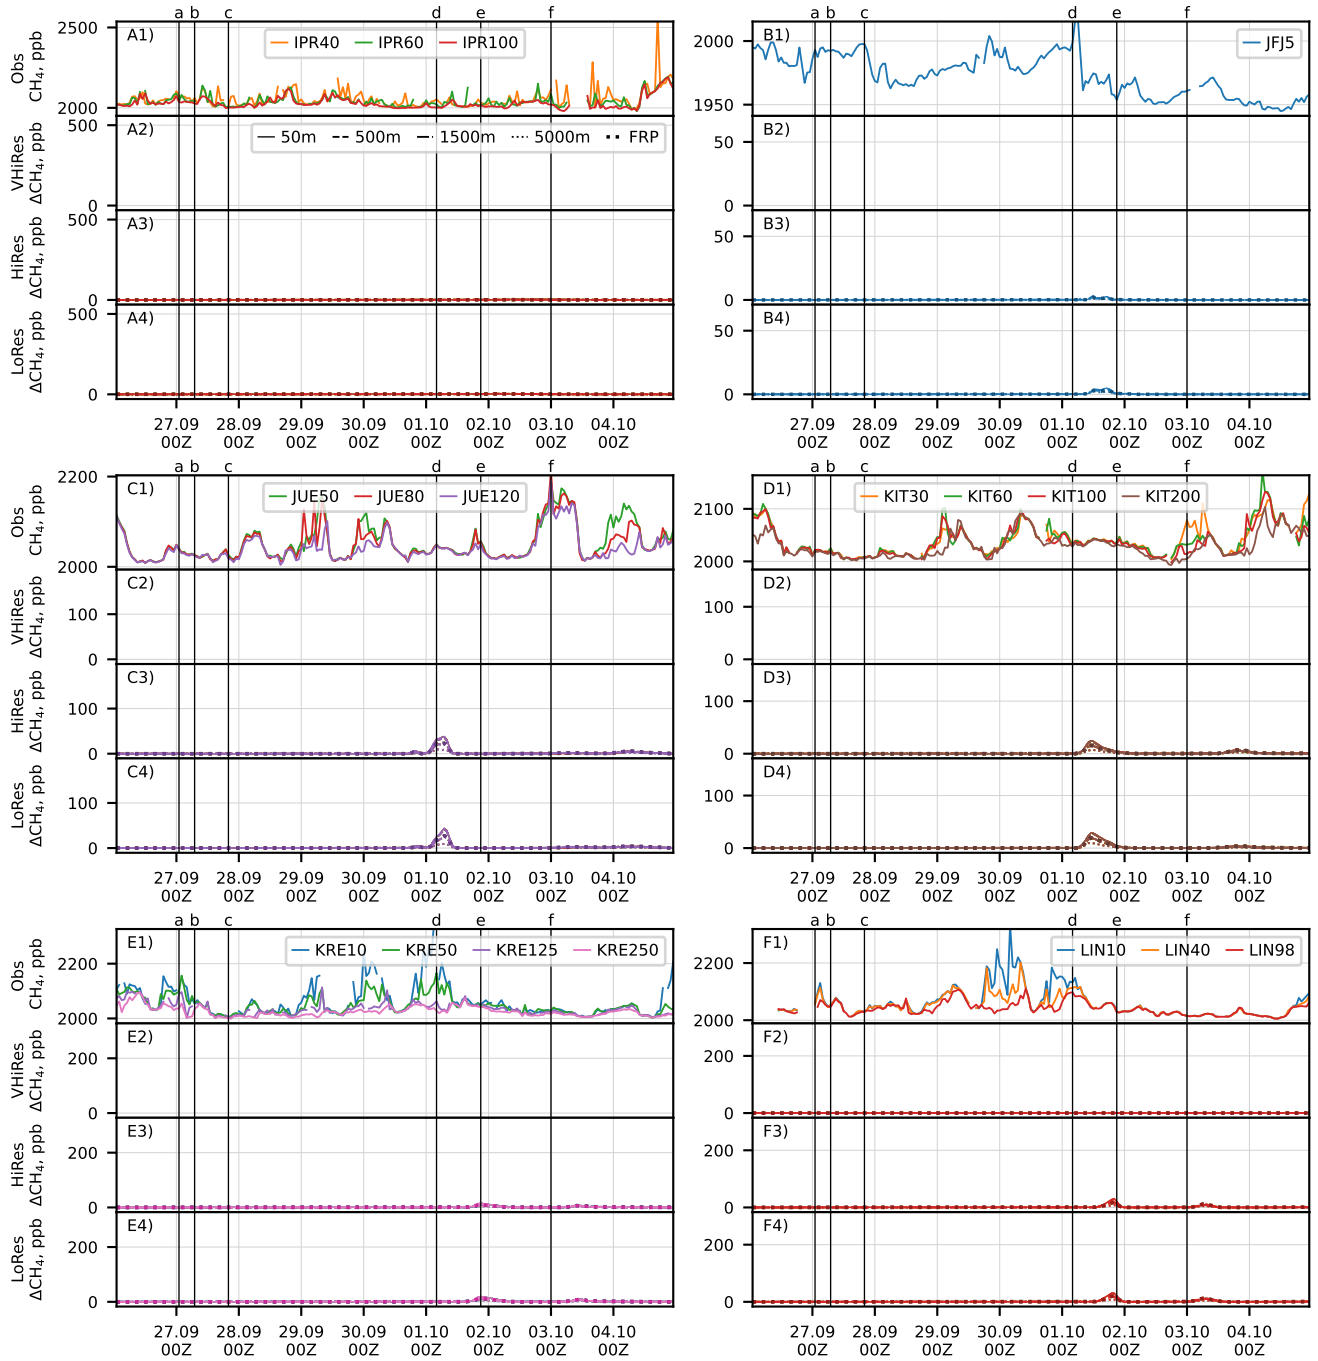

**Figure S3.** Timeseries of methane mixing ratio observed at IPR, JFJ, JUE, KIT, KRE, and LIN stations after the pipeline rupture, and corresponding timeseries simulated with three different resolutions for several vertical profiles of the release. Each group of panels corresponds to a station. The panels in each group are (top down) for observations, and model with 0.02-deg, 0.1-deg, 0.4-deg resolution. Measurement heights are coded with colors, and emission heights with line styles. Vertical lines mark the moments shown in maps of the main paper

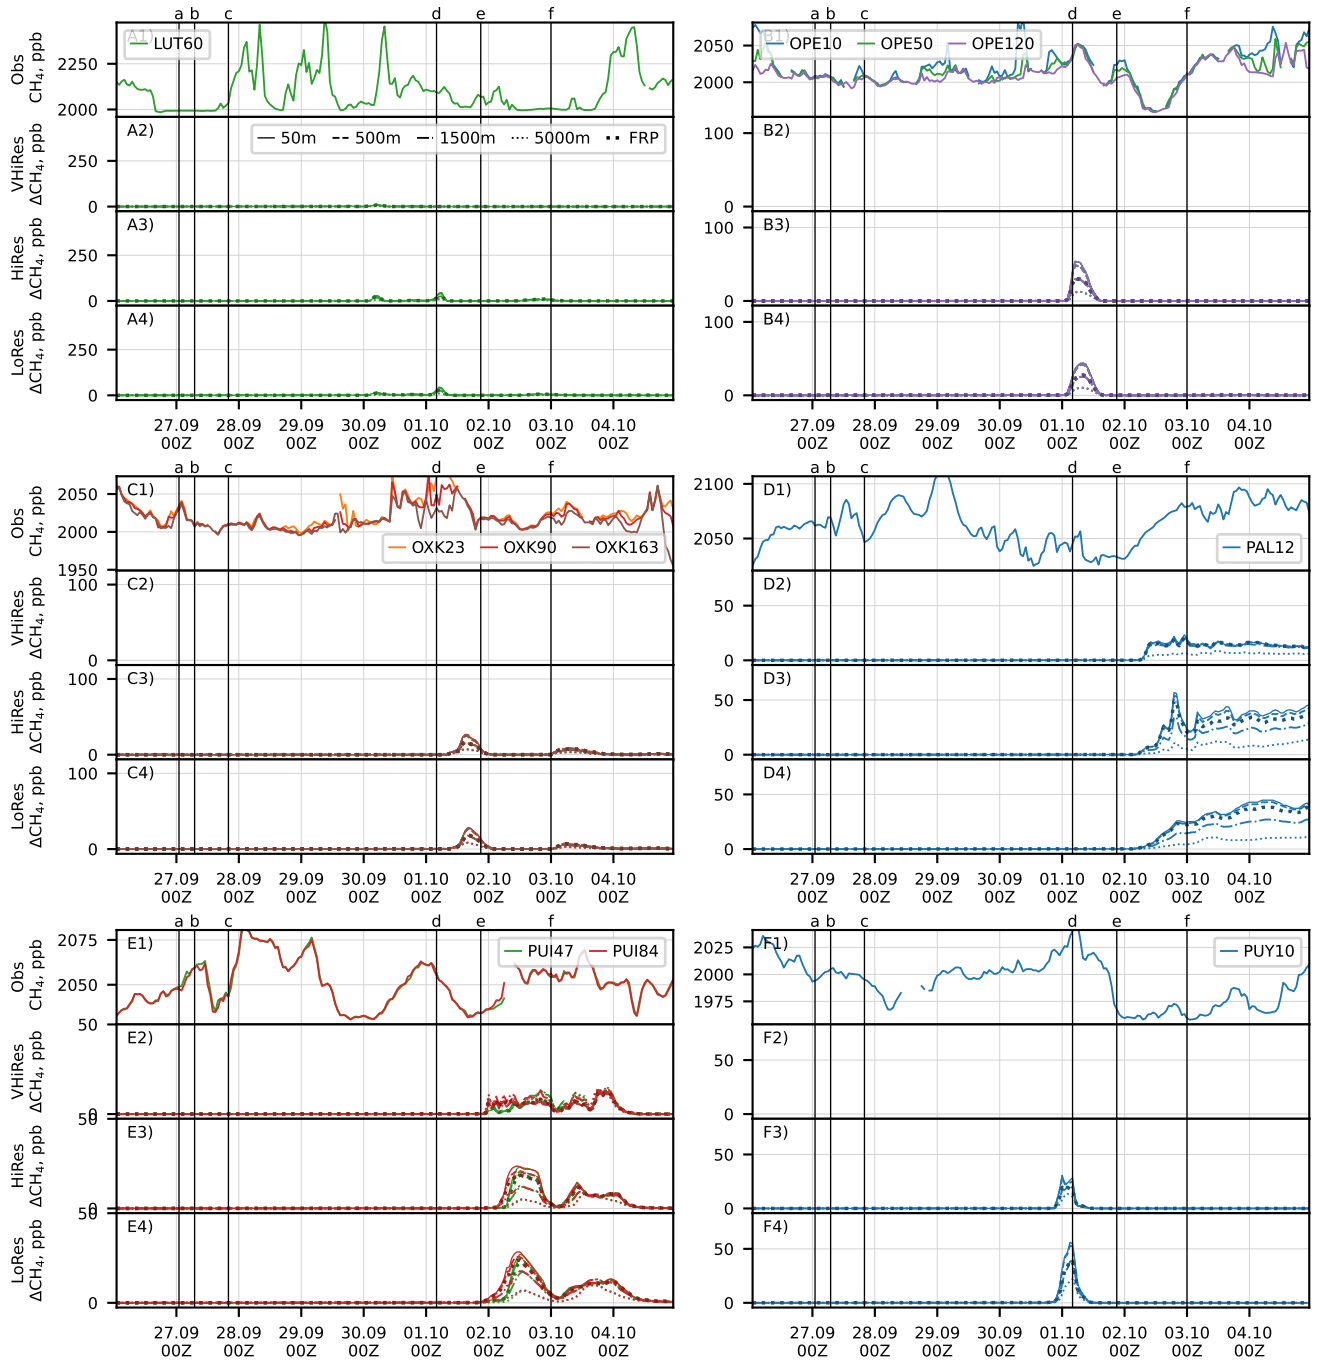

**Figure S4.** Timeseries of methane mixing ratio observed at LUT, OPE, OXK, PAL, PUI, and PUY stations after the pipeline rupture, and corresponding timeseries simulated with three different resolutions for several vertical profiles of the release. Each group of panels corresponds to a station. The panels in each group are (top down) for observations, and model with 0.02-deg, 0.1-deg, 0.4-deg resolution. Measurement heights are coded with colors, and emission heights with line styles. Vertical lines mark the moments shown in maps of the main paper

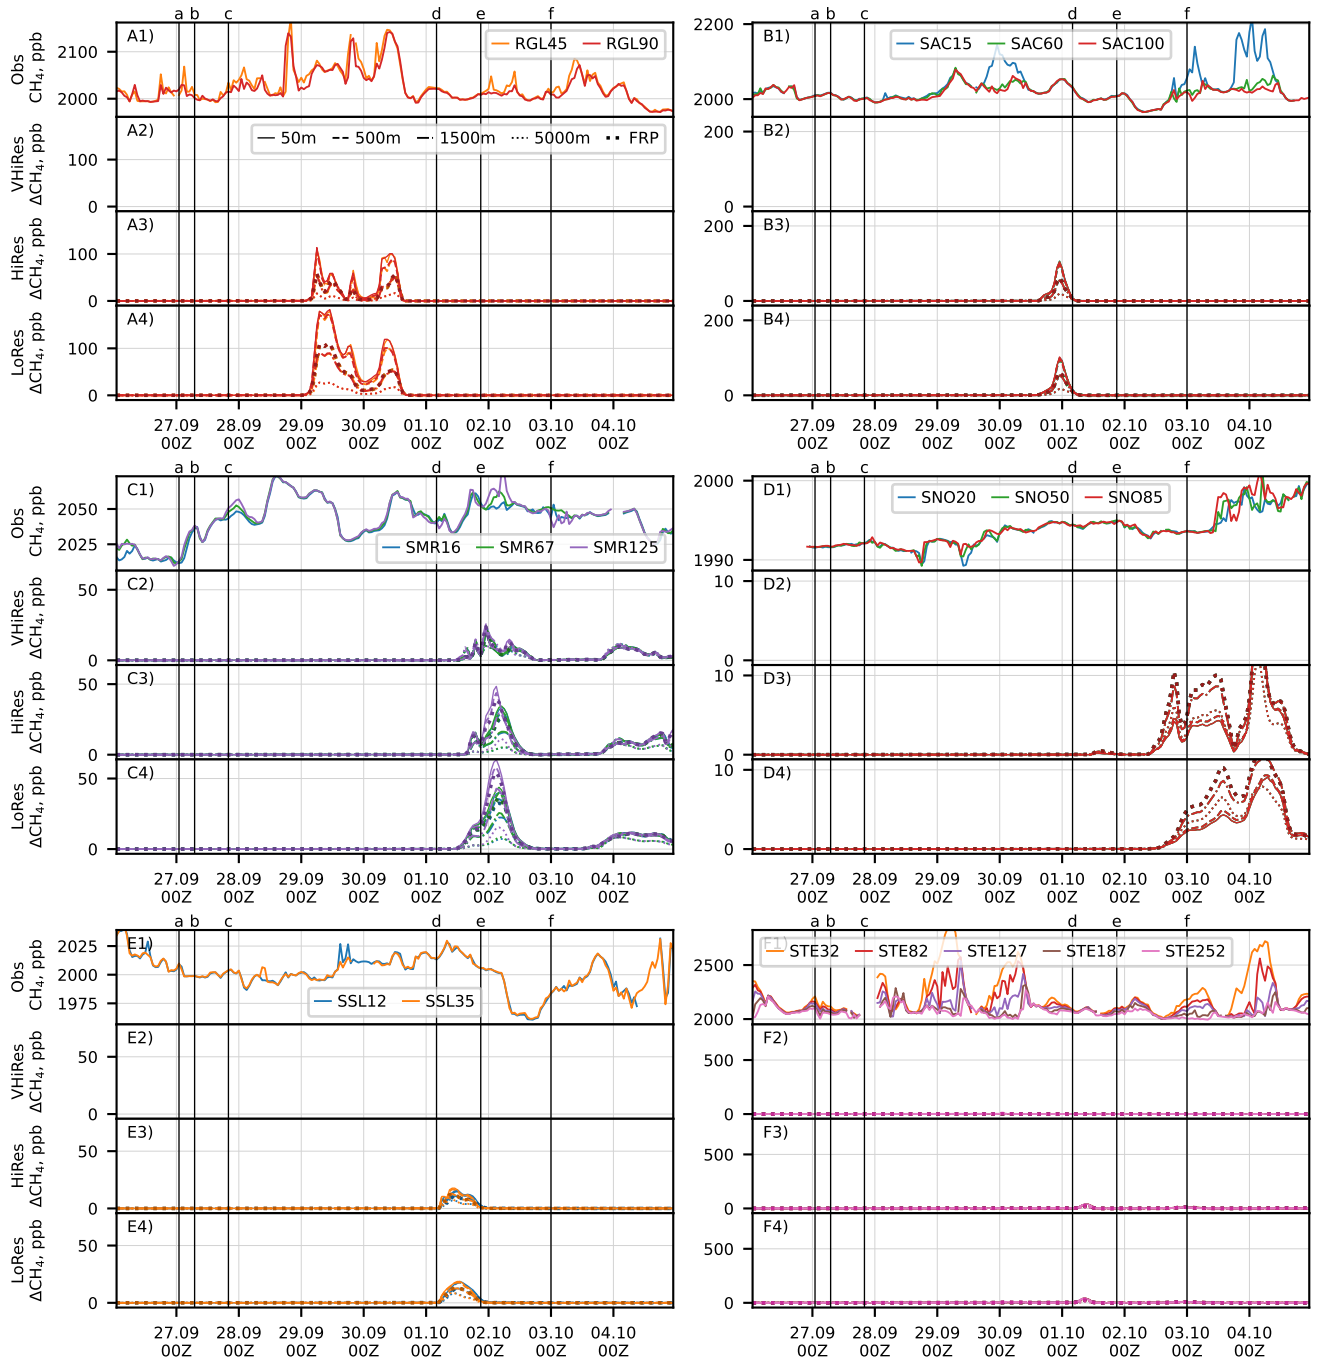

**Figure S5.** Timeseries of methane mixing ratio observed at RGL, SAC, SMR, SNO, SSL, and STE stations after the pipeline rupture, and corresponding timeseries simulated with three different resolutions for several vertical profiles of the release. Each group of panels corresponds to a station. The panels in each group are (top down) for observations, and model with 0.02-deg, 0.1-deg, 0.4-deg resolution. Measurement heights are coded with colors, and emission heights with line styles. Vertical lines mark the moments shown in maps of the main paper

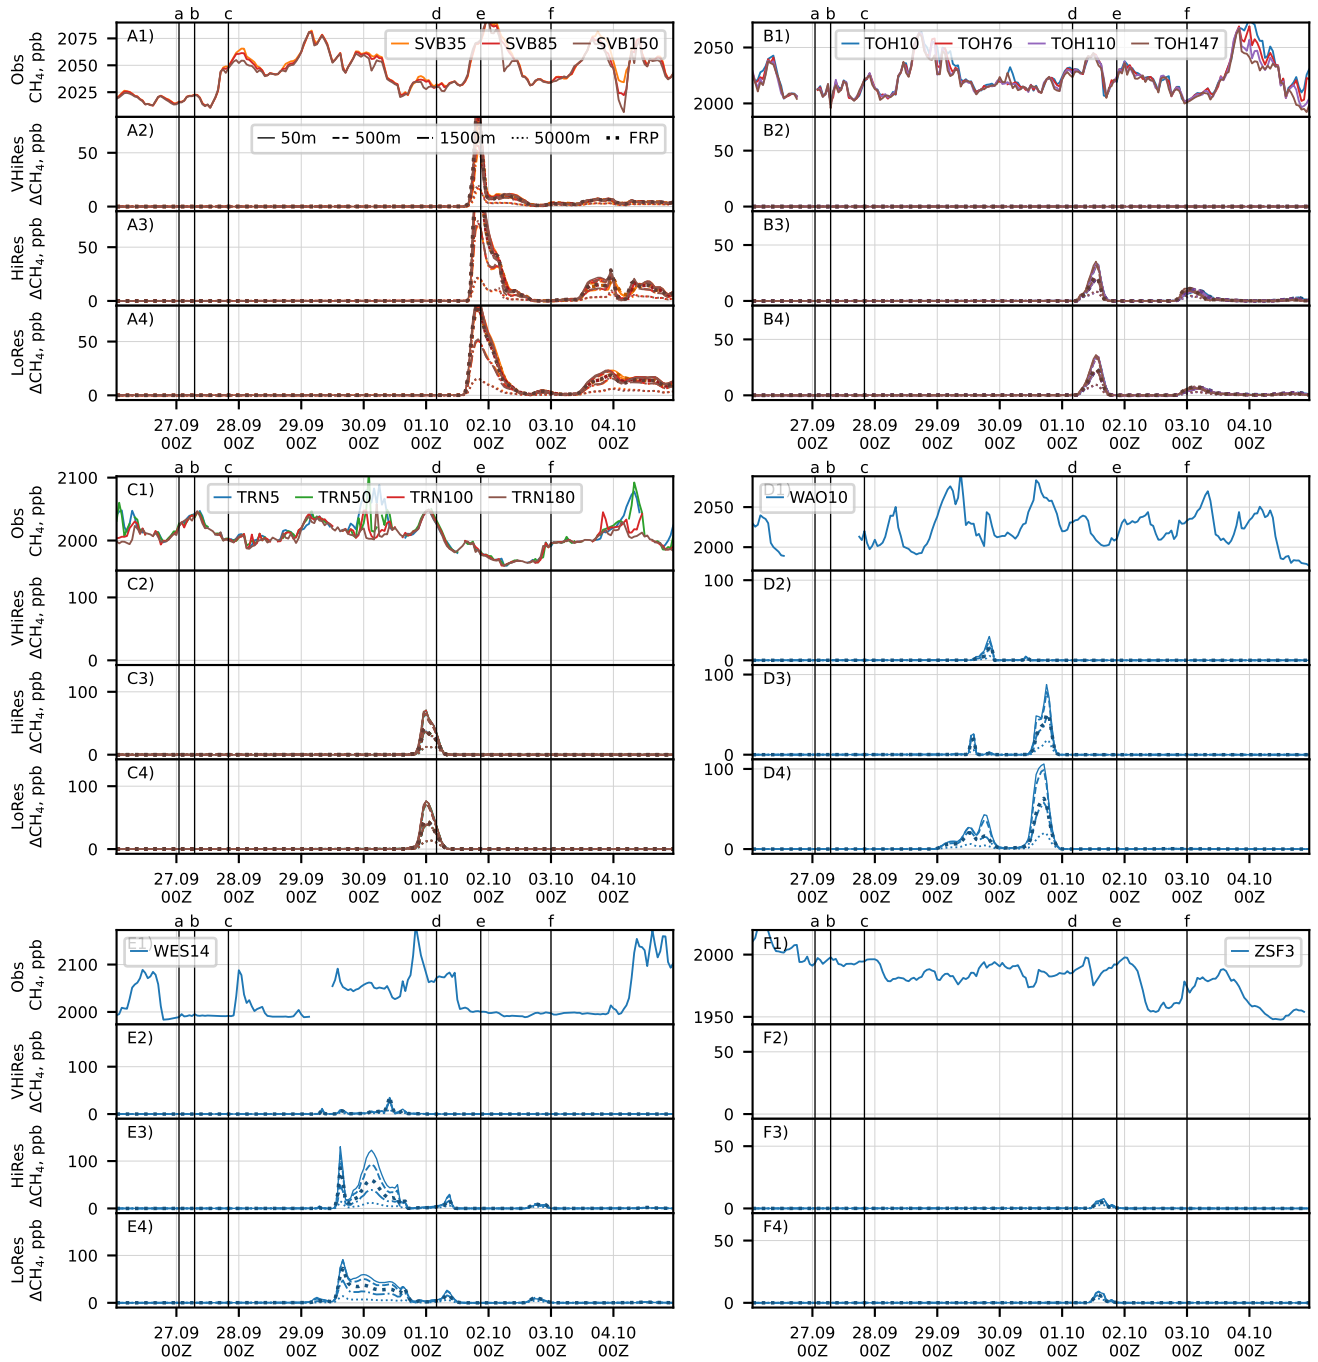

**Figure S6.** Timeseries of methane mixing ratio observed at SVB, TOH, TRN, WAO, WES, and ZSF stations after the pipeline rupture, and corresponding timeseries simulated with three different resolutions for several vertical profiles of the release. Each group of panels corresponds to a station. The panels in each group are (top down) for observations, and model with 0.02-deg, 0.1-deg, 0.4-deg resolution. Measurement heights are coded with colors, and emission heights with line styles. Vertical lines mark the moments shown in maps of the main paper

### 3 LES sensitivity simulations

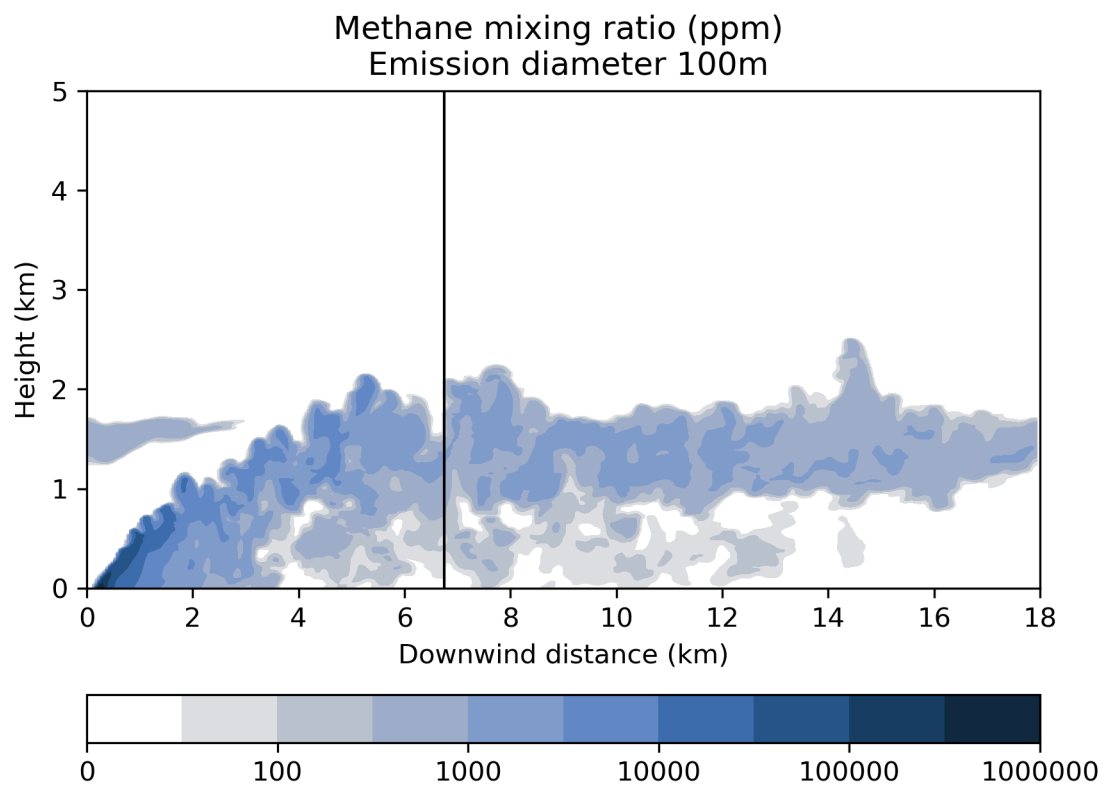

**Figure S7.** Methane mixing ratio in the central line of the LES simulated plume for the maximum methane release from a circle with 100 m diameter. The vertical line indicates the point where the plume rise has finished.



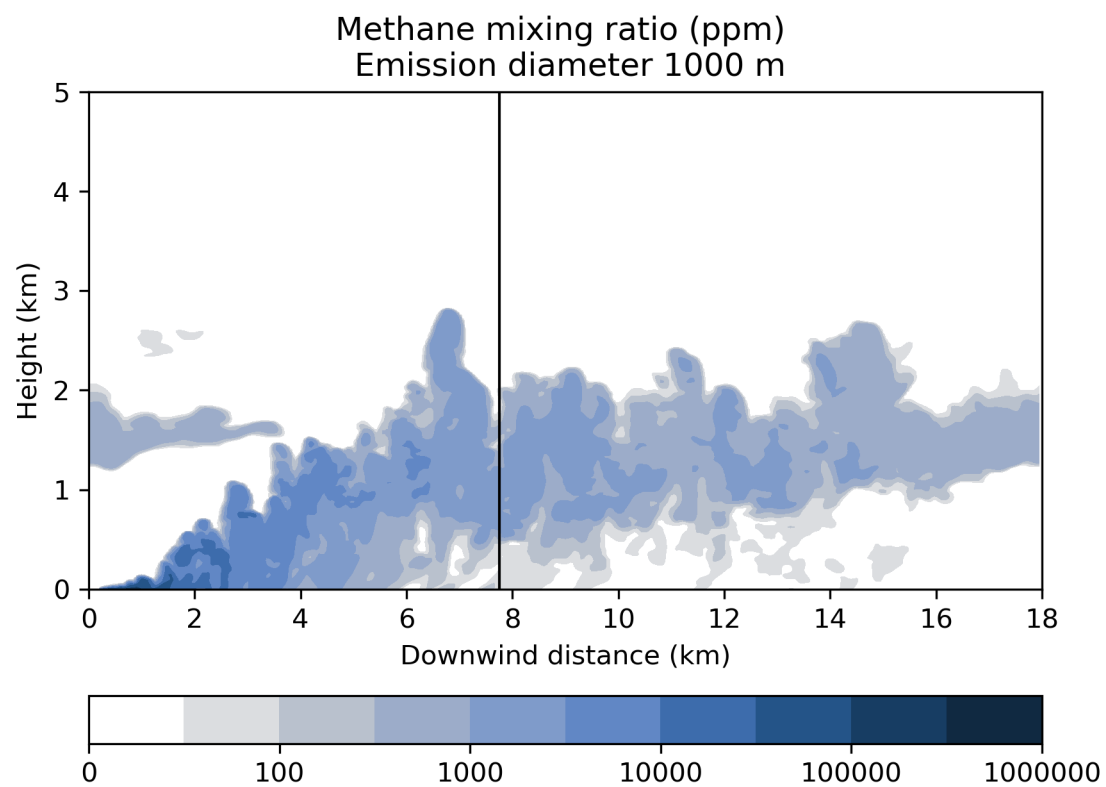

**Figure S8.** LES simulated plume for the maximum methane release from a circle with 1000 m diameter.

#### 4 Acknowledgments for ICOS data

The ICOS data usage policy (<https://www.icos-cp.eu/data-services/about-data-portal/data-license>, accessed 30.11.2022) requires each publication to have a reference for each of the time series used for a study, and the references are different for each measurement height at each station. The table below is intended to fulfill this requirement:

| Code | References                                                                                                                                                                                                                                                                                                                                                                                                                                                                                                                                                                                                                                                                                                                                                                                                                                                                                                                                                                                                                                                                                                                                                                                                                                                                                                                                                                                                                                                                                                                                                               |
|------|--------------------------------------------------------------------------------------------------------------------------------------------------------------------------------------------------------------------------------------------------------------------------------------------------------------------------------------------------------------------------------------------------------------------------------------------------------------------------------------------------------------------------------------------------------------------------------------------------------------------------------------------------------------------------------------------------------------------------------------------------------------------------------------------------------------------------------------------------------------------------------------------------------------------------------------------------------------------------------------------------------------------------------------------------------------------------------------------------------------------------------------------------------------------------------------------------------------------------------------------------------------------------------------------------------------------------------------------------------------------------------------------------------------------------------------------------------------------------------------------------------------------------------------------------------------------------|
| BIR  | Lund Myhre, C., Platt, S. M., Lunder, C., and Hermansen, O.: ICOS ATC NRT CH <sub>4</sub> growing time series, Birkenes (10.0m), 2022-03-01–2022-10-16, <a href="https://hdl.handle.net/11676/a-OqGFe7Aga6-k7CHen39EyQ">https://hdl.handle.net/11676/a-OqGFe7Aga6-k7CHen39EyQ</a> , 2022<br>Lund Myhre, C., Platt, S. M., Lunder, C., and Hermansen, O.: ICOS ATC NRT CH <sub>4</sub> growing time series, Birkenes (50.0m), 2022-03-01–2022-10-16, <a href="https://hdl.handle.net/11676/QhtU7Bpi3hW63r_P_YRETTsU">https://hdl.handle.net/11676/QhtU7Bpi3hW63r_P_YRETTsU</a> , 2022<br>Lund Myhre, C., Platt, S. M., Lunder, C., and Hermansen, O.: ICOS ATC NRT CH <sub>4</sub> growing time series, Birkenes (75.0m), 2022-03-01–2022-10-16, <a href="https://hdl.handle.net/11676/M1WVYeDMY6UtPnSvF6KKmq_L">https://hdl.handle.net/11676/M1WVYeDMY6UtPnSvF6KKmq_L</a> , 2022                                                                                                                                                                                                                                                                                                                                                                                                                                                                                                                                                                                                                                                                                         |
| GAT  | Kubistin, D., Plaß-Dülmer, C., Kneuer, T., Lindauer, M., and Müller-Williams, J.: ICOS ATC NRT CH <sub>4</sub> growing time series, Gartow (30.0m), 2022-03-01–2022-10-16, <a href="https://hdl.handle.net/11676/V9y--C-FvYXiZfojwVq3bw42">https://hdl.handle.net/11676/V9y--C-FvYXiZfojwVq3bw42</a> , 2022<br>Kubistin, D., Plaß-Dülmer, C., Kneuer, T., Lindauer, M., and Müller-Williams, J.: ICOS ATC NRT CH <sub>4</sub> growing time series, Gartow (60.0m), 2022-03-01–2022-10-16, <a href="https://hdl.handle.net/11676/Yk1xCKJYSz_GWeATpDA3Rjt">https://hdl.handle.net/11676/Yk1xCKJYSz_GWeATpDA3Rjt</a> , 2022<br>Kubistin, D., Plaß-Dülmer, C., Kneuer, T., Lindauer, M., and Müller-Williams, J.: ICOS ATC NRT CH <sub>4</sub> growing time series, Gartow (132.0m), 2022-03-01–2022-10-16, <a href="https://hdl.handle.net/11676/Rt04d54IFTra9RYcYIGPQN5H">https://hdl.handle.net/11676/Rt04d54IFTra9RYcYIGPQN5H</a> , 2022<br>Kubistin, D., Plaß-Dülmer, C., Kneuer, T., Lindauer, M., and Müller-Williams, J.: ICOS ATC NRT CH <sub>4</sub> growing time series, Gartow (216.0m), 2022-03-01–2022-10-16, <a href="https://hdl.handle.net/11676/_qPTkWsLArD9RYD1s8gorAM0">https://hdl.handle.net/11676/_qPTkWsLArD9RYD1s8gorAM0</a> , 2022<br>Kubistin, D., Plaß-Dülmer, C., Kneuer, T., Lindauer, M., and Müller-Williams, J.: ICOS ATC NRT CH <sub>4</sub> growing time series, Gartow (341.0m), 2022-03-01–2022-10-16, <a href="https://hdl.handle.net/11676/K5H4gA-BlsJEyT2g8NsCnW9x">https://hdl.handle.net/11676/K5H4gA-BlsJEyT2g8NsCnW9x</a> , 2022 |
| HEL  | Kubistin, D., Plaß-Dülmer, C., Kneuer, T., Lindauer, M., and Müller-Williams, J.: ICOS ATC NRT CH <sub>4</sub> growing time series, Helgoland (110.0m), 2022-03-01–2022-10-16, <a href="https://hdl.handle.net/11676/_NblFnzvy2GGTPpdD0_SpKn-">https://hdl.handle.net/11676/_NblFnzvy2GGTPpdD0_SpKn-</a> , 2022                                                                                                                                                                                                                                                                                                                                                                                                                                                                                                                                                                                                                                                                                                                                                                                                                                                                                                                                                                                                                                                                                                                                                                                                                                                          |

- HPB Kubistin, D., Plaß-Dülmer, C., Kneuer, T., Lindauer, M., and Müller-Williams, J.: ICOS ATC NRT CH<sub>4</sub> growing time series, Hohenpeissenberg (50.0m), 2022-03-01–2022-10-16, [https://hdl.handle.net/11676/tpDePhqI3v9\\_aql5xksIrf8S](https://hdl.handle.net/11676/tpDePhqI3v9_aql5xksIrf8S), 2022
- Kubistin, D., Plaß-Dülmer, C., Kneuer, T., Lindauer, M., and Müller-Williams, J.: ICOS ATC NRT CH<sub>4</sub> growing time series, Hohenpeissenberg (93.0m), 2022-03-01–2022-10-16, [https://hdl.handle.net/11676/nXNqErmYi8m2wemDaJz\\_Z9Dr](https://hdl.handle.net/11676/nXNqErmYi8m2wemDaJz_Z9Dr), 2022
- Kubistin, D., Plaß-Dülmer, C., Kneuer, T., Lindauer, M., and Müller-Williams, J.: ICOS ATC NRT CH<sub>4</sub> growing time series, Hohenpeissenberg (131.0m), 2022-03-01–2022-10-16, [https://hdl.handle.net/11676/GabqfaCOTkNLQnnjz\\_lMn\\_6l](https://hdl.handle.net/11676/GabqfaCOTkNLQnnjz_lMn_6l), 2022
- HTM Heliasz, M. and Biermann, T.: ICOS ATC NRT CH<sub>4</sub> growing time series, Hyltemossa (30.0m), 2022-03-01–2022-10-16, <https://hdl.handle.net/11676/l9QSNswCe3fqCzL0iT7LU8la>, 2022
- Heliasz, M. and Biermann, T.: ICOS ATC NRT CH<sub>4</sub> growing time series, Hyltemossa (70.0m), 2022-03-01–2022-10-16, <https://hdl.handle.net/11676/lV2WF-vf84LsT73z6kWFJgV4>, 2022
- Heliasz, M. and Biermann, T.: ICOS ATC NRT CH<sub>4</sub> growing time series, Hyltemossa (150.0m), 2022-03-01–2022-10-16, <https://hdl.handle.net/11676/-uYDRenkp8mfYPJLhekmx9Ko>, 2022
- IPR Manca, G.: ICOS ATC NRT CH<sub>4</sub> growing time series, Ispra (40.0m), 2022-03-01–2022-10-16, [https://hdl.handle.net/11676/goYrYu\\_b3TRzccaCrnvIdJr](https://hdl.handle.net/11676/goYrYu_b3TRzccaCrnvIdJr), 2022
- Manca, G.: ICOS ATC NRT CH<sub>4</sub> growing time series, Ispra (60.0m), 2022-03-01–2022-10-16, <https://hdl.handle.net/11676/6SNNjlS9H053sR6JuOThvobb>, 2022
- Manca, G.: ICOS ATC NRT CH<sub>4</sub> growing time series, Ispra (100.0m), 2022-03-01–2022-10-16, <https://hdl.handle.net/11676/XaKdSOVJNeCxDzOMPzmUTSck>, 2022
- JFJ Emmenegger, L., Leuenberger, M., and Steinbacher, M.: ICOS ATC NRT CH<sub>4</sub> growing time series, Jungfraujoch (5.0m), 2022-03-01–2022-10-16, [https://hdl.handle.net/11676/k6LNPak\\_XM3nq3cu\\_u7wqTo5](https://hdl.handle.net/11676/k6LNPak_XM3nq3cu_u7wqTo5), 2022
- JUE Kubistin, D., Plaß-Dülmer, C., Kneuer, T., Lindauer, M., and Müller-Williams, J.: ICOS ATC NRT CH<sub>4</sub> growing time series, Jülich (50.0m), 2022-03-01–2022-10-16, [https://hdl.handle.net/11676/UkCEbA\\_UEl0SfhnwnslycsPw](https://hdl.handle.net/11676/UkCEbA_UEl0SfhnwnslycsPw), 2022
- Kubistin, D., Plaß-Dülmer, C., Kneuer, T., Lindauer, M., and Müller-Williams, J.: ICOS ATC NRT CH<sub>4</sub> growing time series, Jülich (80.0m), 2022-03-01–2022-10-16, <https://hdl.handle.net/11676/7bmZAct3TdGB6jcyDMu6PDtp>, 2022
- Kubistin, D., Plaß-Dülmer, C., Kneuer, T., Lindauer, M., and Müller-Williams, J.: ICOS ATC NRT CH<sub>4</sub> growing time series, Jülich (120.0m), 2022-03-01–2022-10-16, [https://hdl.handle.net/11676/LjLTsMHdFxBEBOMm\\_3VfVo8l](https://hdl.handle.net/11676/LjLTsMHdFxBEBOMm_3VfVo8l), 2022

- KIT Kubistin, D., Plaß-Dülmer, C., Kneuer, T., Lindauer, M., and Müller-Williams, J.: ICOS ATC NRT CH<sub>4</sub> growing time series, Karlsruhe (30.0m), 2022-03-01–2022-10-16, <https://hdl.handle.net/11676/-LsGlybsjKN9foX5aNZjBgDD>, 2022
- Kubistin, D., Plaß-Dülmer, C., Kneuer, T., Lindauer, M., and Müller-Williams, J.: ICOS ATC NRT CH<sub>4</sub> growing time series, Karlsruhe (60.0m), 2022-03-01–2022-10-16, [https://hdl.handle.net/11676/KdtRIMM7cTWMgiY4gUFdj\\_xT](https://hdl.handle.net/11676/KdtRIMM7cTWMgiY4gUFdj_xT), 2022
- Kubistin, D., Plaß-Dülmer, C., Kneuer, T., Lindauer, M., and Müller-Williams, J.: ICOS ATC NRT CH<sub>4</sub> growing time series, Karlsruhe (100.0m), 2022-03-01–2022-10-16, <https://hdl.handle.net/11676/Ptxukrr5xLtFUId8G0HtsIU->, 2022
- Kubistin, D., Plaß-Dülmer, C., Kneuer, T., Lindauer, M., and Müller-Williams, J.: ICOS ATC NRT CH<sub>4</sub> growing time series, Karlsruhe (200.0m), 2022-03-01–2022-10-16, <https://hdl.handle.net/11676/b9ItM9jOFqwmxoEnJdP8qJfE>, 2022
- KRE Marek, M., Vítková, G., and Komínková, K.: ICOS ATC NRT CH<sub>4</sub> growing time series, Křešín u Pacova (10.0m), 2022-03-01–2022-10-16, [https://hdl.handle.net/11676/S9IKaCm185wQ-NnhcVfNr\\_FV](https://hdl.handle.net/11676/S9IKaCm185wQ-NnhcVfNr_FV), 2022
- Marek, M., Vítková, G., and Komínková, K.: ICOS ATC NRT CH<sub>4</sub> growing time series, Křešín u Pacova (50.0m), 2022-03-01–2022-10-16, [https://hdl.handle.net/11676/RH17\\_H2biGCsAT8YmFLMP\\_po](https://hdl.handle.net/11676/RH17_H2biGCsAT8YmFLMP_po), 2022
- Marek, M., Vítková, G., and Komínková, K.: ICOS ATC NRT CH<sub>4</sub> growing time series, Křešín u Pacova (125.0m), 2022-03-01–2022-10-16, <https://hdl.handle.net/11676/03tUv86UaHEN3HfcnMAdRfiC>, 2022
- Marek, M., Vítková, G., and Komínková, K.: ICOS ATC NRT CH<sub>4</sub> growing time series, Křešín u Pacova (250.0m), 2022-03-01–2022-10-16, [https://hdl.handle.net/11676/PCHil9Cvetf\\_U1WFBOTweAMr](https://hdl.handle.net/11676/PCHil9Cvetf_U1WFBOTweAMr), 2022
- LIN Kubistin, D., Plaß-Dülmer, C., Kneuer, T., Lindauer, M., and Müller-Williams, J.: ICOS ATC NRT CH<sub>4</sub> growing time series, Lindenberg (10.0m), 2022-03-01–2022-10-16, [https://hdl.handle.net/11676/E\\_1Wtk5M0nPoWUNn2C70x4bA](https://hdl.handle.net/11676/E_1Wtk5M0nPoWUNn2C70x4bA), 2022
- Kubistin, D., Plaß-Dülmer, C., Kneuer, T., Lindauer, M., and Müller-Williams, J.: ICOS ATC NRT CH<sub>4</sub> growing time series, Lindenberg (40.0m), 2022-03-01–2022-10-16, <https://hdl.handle.net/11676/c-IgTGo-sGfd5M1WkwWszTeO>, 2022
- Kubistin, D., Plaß-Dülmer, C., Kneuer, T., Lindauer, M., and Müller-Williams, J.: ICOS ATC NRT CH<sub>4</sub> growing time series, Lindenberg (98.0m), 2022-03-01–2022-10-16, [https://hdl.handle.net/11676/exzokQZTG4d7l\\_uifabPbE2k](https://hdl.handle.net/11676/exzokQZTG4d7l_uifabPbE2k), 2022
- NOR Lehner, I. and Mölder, M.: ICOS ATC NRT CH<sub>4</sub> growing time series, Norunda (32.0m), 2022-03-01–2022-10-16, [https://hdl.handle.net/11676/1hIMjlfGI\\_pDmu8CLT2DNB4R](https://hdl.handle.net/11676/1hIMjlfGI_pDmu8CLT2DNB4R), 2022
- Lehner, I. and Mölder, M.: ICOS ATC NRT CH<sub>4</sub> growing time series, Norunda (58.0m), 2022-03-01–2022-10-16, <https://hdl.handle.net/11676/vZQwyfmyDbICceVXxEefe7h>, 2022
- Lehner, I. and Mölder, M.: ICOS ATC NRT CH<sub>4</sub> growing time series, Norunda (100.0m), 2022-03-01–2022-10-16, <https://hdl.handle.net/11676/DHD1wLPlqqb2Fo-NIWVBHed5>, 2022

- OPE Ramonet, M., Conil, S., Delmotte, M., Laurent, O., and Lopez, M.: ICOS ATC NRT CH<sub>4</sub> growing time series, Observatoire pérenne de l'environnement (10.0m), 2022-03-01–2022-10-13, [https://hdl.handle.net/11676/IOygtpKfddma\\_W3oiuAT1ZwH](https://hdl.handle.net/11676/IOygtpKfddma_W3oiuAT1ZwH), 2022
- Ramonet, M., Conil, S., Delmotte, M., Laurent, O., and Lopez, M.: ICOS ATC NRT CH<sub>4</sub> growing time series, Observatoire pérenne de l'environnement (50.0m), 2022-03-01–2022-10-13, <https://hdl.handle.net/11676/z4xqu1w9Z8rnIR0lb4vGHvWF>, 2022
- Ramonet, M., Conil, S., Delmotte, M., Laurent, O., and Lopez, M.: ICOS ATC NRT CH<sub>4</sub> growing time series, Observatoire pérenne de l'environnement (120.0m), 2022-03-01–2022-10-13, <https://hdl.handle.net/11676/bZRhd65ajH8SUtOaeQY3Zq8s>, 2022
- OXK Kubistin, D., Plaß-Dülmer, C., Kneuer, T., Lindauer, M., and Müller-Williams, J.: ICOS ATC NRT CH<sub>4</sub> growing time series, Ochsenkopf (23.0m), 2022-03-01–2022-10-16, [https://hdl.handle.net/11676/VGRVLKskMd3dXbp\\_StcMSV1p](https://hdl.handle.net/11676/VGRVLKskMd3dXbp_StcMSV1p), 2022
- Kubistin, D., Plaß-Dülmer, C., Kneuer, T., Lindauer, M., and Müller-Williams, J.: ICOS ATC NRT CH<sub>4</sub> growing time series, Ochsenkopf (90.0m), 2022-03-01–2022-10-16, <https://hdl.handle.net/11676/Z8yAT3JQSwGF1zkhywmq1MG2>, 2022
- Kubistin, D., Plaß-Dülmer, C., Kneuer, T., Lindauer, M., and Müller-Williams, J.: ICOS ATC NRT CH<sub>4</sub> growing time series, Ochsenkopf (163.0m), 2022-03-01–2022-10-16, [https://hdl.handle.net/11676/VGHdiYnPch1Zin7x8VapXcw\\_](https://hdl.handle.net/11676/VGHdiYnPch1Zin7x8VapXcw_), 2022
- PAL Hatakka, J.: ICOS ATC NRT CH<sub>4</sub> growing time series, Pallas (12.0m), 2022-03-01–2022-10-16, <https://hdl.handle.net/11676/rdJeKi7QQOsxwQw3VSeNaj-J>, 2022
- PUI Lehtinen, K. and Leskinen, A.: ICOS ATC NRT CH<sub>4</sub> growing time series, Puijo (47.0m), 2022-03-01–2022-10-16, <https://hdl.handle.net/11676/kBDWxEzhukOrauqsMRsEY6EK>, 2022
- Lehtinen, K. and Leskinen, A.: ICOS ATC NRT CH<sub>4</sub> growing time series, Puijo (84.0m), 2022-03-01–2022-10-16, <https://hdl.handle.net/11676/DsxourWEp6XbWbHn3NULXXZW>, 2022
- PUY Colomb, A., Ramonet, M., Yver-Kwok, C., Delmotte, M., Lopez, M., and Pichon, J.-M.: ICOS ATC NRT CH<sub>4</sub> growing time series, Puy de Dôme (10.0m), 2022-03-01–2022-10-16, <https://hdl.handle.net/11676/zNBneKJ90Iuba1ByX7RFNQsO>, 2022
- RGL O'Doherty, S., Pitt, J., and Stanley, K.: ICOS ATC NRT CH<sub>4</sub> growing time series, Ridge Hill (45.0m), 2022-03-01–2022-10-17, <https://hdl.handle.net/11676/sD2PTx5XDblG6eeL5XsCJYzC>, 2022
- O'Doherty, S., Pitt, J., and Stanley, K.: ICOS ATC NRT CH<sub>4</sub> growing time series, Ridge Hill (90.0m), 2022-03-01–2022-10-17, [https://hdl.handle.net/11676/dtiLBJJH-nU7J5lk\\_eiD7re9](https://hdl.handle.net/11676/dtiLBJJH-nU7J5lk_eiD7re9), 2022

- SAC Ramonet, M., Delmotte, M., and Lopez, M.: ICOS ATC NRT CH<sub>4</sub> growing time series, Saclay (15.0m), 2022-03-01–2022-10-16, [https://hdl.handle.net/11676/2OEqomsjwEiAuVuh\\_pmqXaI6](https://hdl.handle.net/11676/2OEqomsjwEiAuVuh_pmqXaI6), 2022
- Ramonet, M., Delmotte, M., and Lopez, M.: ICOS ATC NRT CH<sub>4</sub> growing time series, Saclay (60.0m), 2022-03-01–2022-10-16, <https://hdl.handle.net/11676/OFcnDyU5n8teVee7cQE4HQMR>, 2022
- Ramonet, M., Delmotte, M., and Lopez, M.: ICOS ATC NRT CH<sub>4</sub> growing time series, Saclay (100.0m), 2022-03-01–2022-10-16, <https://hdl.handle.net/11676/bYoPT0y8E9jQTPz8-3wdKATq>, 2022
- SMR Mammarella, I.: ICOS ATC NRT CH<sub>4</sub> growing time series, Hyytiälä (16.8m), 2022-03-01–2022-10-16, [https://hdl.handle.net/11676/\\_VIaDFlasf9eqC00lc0Wt8ld](https://hdl.handle.net/11676/_VIaDFlasf9eqC00lc0Wt8ld), 2022
- Mammarella, I.: ICOS ATC NRT CH<sub>4</sub> growing time series, Hyytiälä (67.2m), 2022-03-01–2022-10-16, [https://hdl.handle.net/11676/OHBTBXX\\_moBvOamYhLuK91kN](https://hdl.handle.net/11676/OHBTBXX_moBvOamYhLuK91kN), 2022
- Mammarella, I.: ICOS ATC NRT CH<sub>4</sub> growing time series, Hyytiälä (125.0m), 2022-03-01–2022-10-16, [https://hdl.handle.net/11676/8Z0\\_no6uqvW-Z5-YaxG-p2zu](https://hdl.handle.net/11676/8Z0_no6uqvW-Z5-YaxG-p2zu), 2022
- SNO Sørensen, L. L.: ICOS ATC NRT CH<sub>4</sub> growing time series, Station Nord (20.0m), 2022-03-01–2022-10-15, [https://hdl.handle.net/11676/0VId\\_7TCnbnB0ewwRq3KKDxA](https://hdl.handle.net/11676/0VId_7TCnbnB0ewwRq3KKDxA), 2022
- Sørensen, L. L.: ICOS ATC NRT CH<sub>4</sub> growing time series, Station Nord (50.0m), 2022-03-01–2022-10-15, [https://hdl.handle.net/11676/om8NsBr5VVrBDXEGK6r3Dqk\\_](https://hdl.handle.net/11676/om8NsBr5VVrBDXEGK6r3Dqk_), 2022
- Sørensen, L. L.: ICOS ATC NRT CH<sub>4</sub> growing time series, Station Nord (85.0m), 2022-03-01–2022-10-15, <https://hdl.handle.net/11676/rvVRDSVnmZc8OYVqYW5Ud7WA>, 2022
- SSL Schmidt, M., Hoheisel, A., and Meinhardt, F.: ICOS ATC NRT CH<sub>4</sub> growing time series, Schauinsland (12.0m), 2022-03-01–2022-10-16, <https://hdl.handle.net/11676/WRq3GAacDZ5efGRvXy5INLEh>, 2022
- Schmidt, M., Hoheisel, A., and Meinhardt, F.: ICOS ATC NRT CH<sub>4</sub> growing time series, Schauinsland (35.0m), 2022-03-01–2022-10-16, [https://hdl.handle.net/11676/T0VPT5fzrNglUJHBid\\_3-XGr](https://hdl.handle.net/11676/T0VPT5fzrNglUJHBid_3-XGr), 2022

- STE Kubistin, D., Plaß-Dülmer, C., Kneuer, T., Lindauer, M., and Müller-Williams, J.: ICOS ATC NRT CH<sub>4</sub> growing time series, Steinkimmen (32.0m), 2022-03-01–2022-10-16, <https://hdl.handle.net/11676/m6ruG6tLLMDKHDxYhBf7fZTC>, 2022
- Kubistin, D., Plaß-Dülmer, C., Kneuer, T., Lindauer, M., and Müller-Williams, J.: ICOS ATC NRT CH<sub>4</sub> growing time series, Steinkimmen (82.0m), 2022-03-01–2022-10-16, [https://hdl.handle.net/11676/FoGwNwIRz6miY\\_iQAjP2Ii7](https://hdl.handle.net/11676/FoGwNwIRz6miY_iQAjP2Ii7), 2022
- Kubistin, D., Plaß-Dülmer, C., Kneuer, T., Lindauer, M., and Müller-Williams, J.: ICOS ATC NRT CH<sub>4</sub> growing time series, Steinkimmen (127.0m), 2022-03-01–2022-10-16, [https://hdl.handle.net/11676/REnpItg\\_iiGxHJ5xtWnP\\_8bw](https://hdl.handle.net/11676/REnpItg_iiGxHJ5xtWnP_8bw), 2022
- Kubistin, D., Plaß-Dülmer, C., Kneuer, T., Lindauer, M., and Müller-Williams, J.: ICOS ATC NRT CH<sub>4</sub> growing time series, Steinkimmen (187.0m), 2022-03-01–2022-10-16, <https://hdl.handle.net/11676/UpPwac-1xsF8iv5W5HLczqXE>, 2022
- Kubistin, D., Plaß-Dülmer, C., Kneuer, T., Lindauer, M., and Müller-Williams, J.: ICOS ATC NRT CH<sub>4</sub> growing time series, Steinkimmen (252.0m), 2022-03-01–2022-10-16, <https://hdl.handle.net/11676/u8RiEqWrtgCYI2-gz3PPHggC>, 2022
- SVB Smith, P. and Marklund, P.: ICOS ATC NRT CH<sub>4</sub> growing time series, Svartberget (35.0m), 2022-03-01–2022-10-16, [https://hdl.handle.net/11676/oMP0-ilovLa\\_FgN-mn\\_VE8\\_a](https://hdl.handle.net/11676/oMP0-ilovLa_FgN-mn_VE8_a), 2022
- Smith, P. and Marklund, P.: ICOS ATC NRT CH<sub>4</sub> growing time series, Svartberget (85.0m), 2022-03-01–2022-10-16, <https://hdl.handle.net/11676/wDec3ThQnChg1AJn00AoaUeY>, 2022
- Smith, P. and Marklund, P.: ICOS ATC NRT CH<sub>4</sub> growing time series, Svartberget (150.0m), 2022-03-01–2022-10-16, <https://hdl.handle.net/11676/2Y3LTpc1OkrZeghUt5EDj6g->, 2022
- TOH Kubistin, D., Plaß-Dülmer, C., Kneuer, T., Lindauer, M., and Müller-Williams, J.: ICOS ATC NRT CH<sub>4</sub> growing time series, Torfhaus (10.0m), 2022-03-01–2022-10-16, <https://hdl.handle.net/11676/CSuR9J0R-G44NUHHOyiSC3bD>, 2022
- Kubistin, D., Plaß-Dülmer, C., Kneuer, T., Lindauer, M., and Müller-Williams, J.: ICOS ATC NRT CH<sub>4</sub> growing time series, Torfhaus (76.0m), 2022-03-01–2022-10-16, <https://hdl.handle.net/11676/ZAQZlwraiwdboq9yq9FgQLUj>, 2022
- Kubistin, D., Plaß-Dülmer, C., Kneuer, T., Lindauer, M., and Müller-Williams, J.: ICOS ATC NRT CH<sub>4</sub> growing time series, Torfhaus (110.0m), 2022-03-01–2022-10-16, <https://hdl.handle.net/11676/p2KhPvHpj7cwkB-MBTTQIIAs>, 2022
- Kubistin, D., Plaß-Dülmer, C., Kneuer, T., Lindauer, M., and Müller-Williams, J.: ICOS ATC NRT CH<sub>4</sub> growing time series, Torfhaus (147.0m), 2022-03-01–2022-10-16, <https://hdl.handle.net/11676/G7UZq17cJOv73PD8C1F6pXa5>, 2022

- TRN Ramonet, M., Lopez, M., and Delmotte, M.: ICOS ATC NRT CH<sub>4</sub> growing time series, Trainou (5.0m), 2022-03-01–2022-10-16, <https://hdl.handle.net/11676/OibG252tDcaEI2MOD78vbqgF>, 2022
- Ramonet, M., Lopez, M., and Delmotte, M.: ICOS ATC NRT CH<sub>4</sub> growing time series, Trainou (50.0m), 2022-03-01–2022-10-16, <https://hdl.handle.net/11676/05LuKIIGSSNQfFa5L0ZgBVLA>, 2022
- Ramonet, M., Lopez, M., and Delmotte, M.: ICOS ATC NRT CH<sub>4</sub> growing time series, Trainou (100.0m), 2022-03-01–2022-10-16, <https://hdl.handle.net/11676/7wYtAL9Y38kh3ED0atWrHhiV>, 2022
- Ramonet, M., Lopez, M., and Delmotte, M.: ICOS ATC NRT CH<sub>4</sub> growing time series, Trainou (180.0m), 2022-03-01–2022-10-16, <https://hdl.handle.net/11676/f-MK6g3DvGYhi8kS4-UVQ-Dx>, 2022
- UTO Hatakka, J. and Laurila, T.: ICOS ATC NRT CH<sub>4</sub> growing time series, Utö - Baltic sea (57.0m), 2022-03-01–2022-10-16, [https://hdl.handle.net/11676/yFO\\_L2onDwckHg\\_2194ej4Mx](https://hdl.handle.net/11676/yFO_L2onDwckHg_2194ej4Mx), 2022
- WAO Forster, G. and Manning, A.: ICOS ATC NRT CH<sub>4</sub> growing time series, Weybourne (10.0m), 2022-03-01–2022-10-16, <https://hdl.handle.net/11676/YBfukffFk8tReEQDf5sj5sLM>, 2022
- WES Couret, C. and Schmidt, M.: ICOS ATC NRT CH<sub>4</sub> growing time series, Westerland (14.0m), 2022-03-01–2022-10-16, <https://hdl.handle.net/11676/5L0cqOHBSQZUPwtzBf-SNXzs>, 2022
- ZEP Lund Myhre, C., Platt, S. M., Hermansen, O., and Lunder, C.: ICOS ATC NRT CH<sub>4</sub> growing time series, Zeppelin (15.0m), 2022-03-01–2022-10-16, <https://hdl.handle.net/11676/jRuxDepDwdYIgT6bnMyS1Kb4>, 2022
- ZSF Couret, C. and Schmidt, M.: ICOS ATC NRT CH<sub>4</sub> growing time series, Zugspitze (3.0m), 2022-03-01–2022-10-16, <https://hdl.handle.net/11676/Nt6A1n9YgfvESDwZ2tbTu5hE>, 2022
